# Supplementary material
Source: Research Square preprint supplement (doi:10.21203/rs.3.rs-8586604/v1)
Supplement: Supplementary file 1 [file acd5ad063b661c2dce444333.docx]

**Focus Group Discussion Guide**

**Study Topic: Implementation of the Standardized HIV Care Clinic Model**

**Introduction & Warm-up:**

- Could you briefly describe your primary role and responsibilities within the standardized clinic?

**Section 1: Overall Experience and Perception**

1. Reflecting on the entire process of clinic standardization, what has been your most profound personal experience or feeling?
2. Compared to before the standardization, what specific changes have occurred in the **core scenarios** of your daily work (e.g., patient consultations, team collaboration, case management)? Please provide examples.

**Section 2: Workflow and Physical Layout**

1. **Descriptive:** Could you walk me through the current complete journey of a typical patient from entering to leaving the clinic? What are the most significant differences in this journey compared to the past?
2. **Impact:** Regarding the new workflow and layout, what are your specific observations on how they have **improved efficiency** (e.g., time saved, reduced duplication) and **potentially created new challenges** (e.g., coordination between steps, information transfer)?

**Section 3: Patient Experience**

1. Based on your observations, what **observable reactions or behavioral changes** have you noticed in patients regarding alterations in the **physical environment** (e.g., privacy, waiting area) and **service processes** (e.g., convenience of visit, communication time)?
2. In your interactions with patients, have they expressed any new, unmet expectations since the standardization? What implications might this have for our future service design?

**Section 4: Training, Capacity Building**

1. What training and support did you receive to adapt to the standardized clinic? Which parts have proven **most useful** or **least aligned** with your practical work, and why?
2. Has the new working model changed the **frequency, methods, or nature of collaboration** between you and your colleagues (e.g., different roles, levels)? Please illustrate with examples.

**Section 5: Enablers, Barriers, and Future Recommendations**

1. **Facilitators:** During the implementation, which **institutional** (e.g., policies, incentives), **resource-based** (e.g., staffing, equipment), or **cultural** (e.g., leadership support, team consensus) factors were key facilitators?
2. **Barriers & Adaptation:** What was the most significant barrier or difficulty you encountered? How did you or the team attempt to address it? What did you learn from this experience?
3. **Future Recommendations:** Based on this experience, what would be your three most critical recommendations for future similar improvement projects? (Please consider **sustainability** and **scalability**).

**Closing:**

- Is there any important aspect of your experience with the standardized clinic that we haven’t covered but you feel is essential to understand?
